# Supplementary material
Source: Springer Nature journal article supplement (https://www.springerprofessional.de/resource/supplementary/13638_2011_21_MOESM13_ESM.pdf/11897282)
Supplement: MOESM13 [file 11897282]

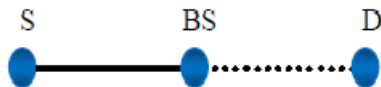

(a) Infrastructure based wireless network

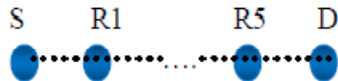

(b) Multi-hop wireless network.

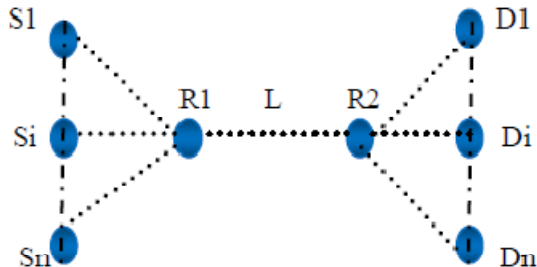

(c) Dumbbell shaped wireless network.
